# Supplementary material for: Metabolite Profiling Reveals Developmental Inequalities in Pinot Noir Berry Tissues Late in Ripening
Source: Front Plant Sci. 2017 Jun 30;8:1108. doi: 10.3389/fpls.2017.01108 (PMC5491620; doi:10.3389/fpls.2017.01108)
Supplement: DATA SHEET S1 — Metabolite annotation. [file Data_Sheet_1.XLSX]

## Sheet: Annotation
concatenated	metabolite id	detection mode	row m/z	row retention time	Putative compound	MS2	MS3	group	Level of identification		Level of metabolite identification (Sumner et al., 2007):
6-negative	6	negative	365.958	17.9378	tryptophan-N-glucoside	m/z I % 185.8 100.0 203.8 69.5 141.8 51.7 186.7 11.5 245.8 8.5 204.8 7.6 157.8 4.5 142.8 3.0 217.7 2.8 248.9 1.7 112.8 1.4 115.8 1.4	m/z I % 141.8 100.0 142.7 7.3 157.9 1.5	Amino Acid	3			1: precisely identified compound with authentic commercial standard;
13-positive	13	positive	175.097	2.4139	Arginine	m/z I % 60.3 100.0 157.5 92.0 116.0 87.6 130.2 54.1 70.4 37.9 143.4 23.3	nf	Amino Acid	1			2: putatively identified compound based upon physicochemical properties similarity with databases
9-positive	9	positive	86.2341	3.35718	Fragment of Leucine			Amino Acid	3			3: putatively identified compound class through the comparison of properties of a specific class of compounds
312-positive	312	positive	69.3697	3.23425	Fragment of Leucine			Amino Acid	3
11-positive	11	positive	120.132	4.6027	Fragment of Phenylalanine			Amino Acid	3
7-positive	7	positive	187.988	10.0678	Fragment of Tryptophan			Amino Acid	3
5-positive	5	positive	132.119	3.34499	Leucine/isoleucine	m/z I % 86.2 100.0 87.3 4.0	m/z I % 69.2 100.0	Amino Acid	2
114-positive	114	positive	474.09	3.27432	Leucine/isoleucine hexose	m/z I % 132.0 100.0 311.9 70.7		Amino Acid	1
6-positive	6	positive	166.072	4.6065	Phenylalanine	m/z I % 120.1 100.0 149.0 3.8 131.0 2.1	m/z I % 93.1 100.0 103.1 94.2	Amino Acid	1
19-positive	19	positive	116.104	2.67738	Proline	m/z I % 70.3 100.0		Amino Acid	1
10-positive	10	positive	205.002	10.0109	Tryptophan	m/z I % 188.0 100.0 146.1 3.2 188.8 1.3		Amino Acid	1
56-negative	56	negative	446.632	16.3551	cyanidin-3-O-glucoside	m/z I % 284.7 100.0 285.6 21.0 284.0 19.1	m/z I % 124.8 100.0 256.7 81.0 240.8 77.1 162.8 66.1 282.7 64.7 283.6 52.9 212.7 50.9 216.7 50.4 255.8 46.5 242.7 41.4 146.8 40.6 198.7 25.5 148.7 25.3 239.8 22.6 176.7 21.8 257.6 19.9	Anthocyanin	1
68-negative	68	negative	463.148	14.3462	delfinidin-3-O-glucoside	m/z I % 300.7 100.0 299.9 65.5 314.7 22.0 336.8 21.2 301.7 14.8	m/z I % 282.7 100.0 162.7 78.7 299.7 76.5 271.7 57.6 298.8 56.9 232.8 54.9 176.7 53.8 255.8 50.9	Anthocyanin	1
209-negative	209	negative	480.798	14.8304	delfinidin-3-O-glucoside hydrate	m/z I % 300.8 100.0 174.7 49.8 354.8 48.3 256.8 13.9 301.7 10.3	m/z I % 256.8 100.0 148.7 90.3 258.7 69.0 174.7 58.3 272.7 44.3 282.8 32.9 257.7 28.7 214.7 23.8 283.8 15.1 210.8 12.1 232.7 9.2 124.9 8.3 230.7 7.5	Anthocyanin	3
10-negative	10	negative	490.911	19.1925	Malvidin-3-O-glucoside	m/z I % 328.8 100.0 329.5 7.7 313.9 5.5 330.7 2.9 342.8 2.6 312.9 2.1 178.8 1.4 298.8 1.1 327.9 1.0 315.0 0.9 271.9 0.8 331.1 0.6 299.8 0.6	m/z I % 313.8 100.0 298.8 23.8 312.9 14.0 314.7 12.2 146.7 11.8 269.8 8.6 284.8 8.2 285.8 6.7 270.8 6.1 297.8 3.9 147.8 3.7 302.0 2.9 120.9 2.2 300.7 2.2	Anthocyanin	1
16-negative	16	negative	508.597	19.1028	Malvidin-3-O-glucoside hydrate	m/z I % 328.9 100.0 346.8 80.8 354.8 36.6 462.9 34.0 329.8 13.3 192.8 12.8	m/z I % 313.8 100.0 148.7 14.3 166.7 9.7 314.7 7.3 284.9 5.3 298.8 4.9 269.9 3.8 124.8 3.4 311.6 3.3	Anthocyanin	3
472-negative	472	negative	328.879	19.168	Malvidin, putative fragment of Malvidin-3-O-glucoside			Anthocyanin	3
81-negative	81	negative	401.068	13.9986	Pelargonidin pentoside	m/z I % 268.8 100.0 160.8 71.0 158.7 21.8 292.9 9.0 269.7 7.7 232.7 7.6	m/z I % 160.7 100.0 158.8 30.3	Anthocyanin	2
52-negative	52	negative	447.13	13.9767	Pelargonidin pentoside, formic acid adduct	m/z I % 400.8 100.0	m/z I % 268.8 100.0 160.7 51.2 232.7 18.1 269.7 13.5 274.7 7.0 250.9 6.2	Anthocyanin	3
11-negative	11	negative	460.938	18.5366	Peonidin 3 O glucoside	m/z I % 298.8 100.0 299.6 17.0 414.8 4.4 283.7 2.8 312.8 1.7 284.9 1.2 340.7 1.1 254.9 0.9 239.9 0.9 146.8 0.9	m/z I % 283.7 100.0 146.7 27.8 282.9 27.0 284.7 13.5 239.7 11.7 254.8 6.3 255.7 3.8 270.8 3.7 242.8 3.2 174.7 3.1 211.8 2.7 240.8 2.1 256.8 2.0 267.7 1.8 118.8 1.8 184.7 1.7	Anthocyanin	1
109-negative	109	negative	476.895	16.8703	petunidin-3-O-glucoside	m/z I % 314.8 100.0 314.0 19.2 315.7 15.1 299.8 9.4	m/z I % 299.7 100.0 298.8 26.7 300.7 16.5 271.8 14.3 286.8 8.2 162.7 7.5 298.0 7.0 282.8 5.4 272.8 5.1 312.7 4.9 231.7 4.4 124.8 4.1 255.8 4.0 313.7 3.9 270.7 3.7 164.7 2.7 246.9 2.6	Anthocyanin	1
157-negative	157	negative	494.843	16.8656	petunidin-3-O-glucoside hydrate	m/z I % 314.8 100.0 368.8 19.9 315.6 14.0 270.9 9.1	m/z I % 299.8 100.0 270.8 49.4 148.8 30.8 246.7 16.9 255.7 15.8 300.8 11.0 271.8 8.6 228.8 8.5 286.8 6.9 272.7 6.5 296.7 5.0 229.8 4.0 238.7 3.7 282.9 3.6 273.7 2.9	Anthocyanin	3
23-positive	23	positive	448.957	16.288	Cyanidin hexoside	m/z I % 287.1 100.0	m/z I % 231.0 100.0 137.0 96.9 212.8 88.8 142.9 62.8 198.9 48.9	Anthocyanin	1
49-positive	49	positive	464.946	14.8172	Delphinidin hexoside	m/z I % 303.1 100.0	m/z I % 257.0 100.0 228.9 31.7 153.0 16.1 149.6 13.4	Anthocyanin	1
4-positive	4	positive	493.003	19.1935	Malvidin hexoside	m/z I % 331.0 100.0 331.7 16.1	m/z I % 315.3 100.0 298.8 98.2 270.0 69.8 287.0 62.9 241.9 27.4 178.9 19.7 150.2 10.7	Anthocyanin	1
340-positive	340	positive	518.863	21.8001	Malvidin hexoside derivative (ethyl group)	m/z I % 356.6 100.0	m/z I % 172.9 100.0	Anthocyanin	3
839-positive	839	positive	560.948	21.525	Malvidin hexoside pyruvate	m/z I % 399.0 100.0 367.2 1.9 449.4 1.9	m/z I % 352.9 100.0 366.5 96.2 383.3 90.6	Anthocyanin	2
834-positive	834	positive	494.83	24.4795	Malvidin hexoside, isotope			Anthocyanin	2
108-positive	108	positive	463.031	22.1215	Malvidin pentoside	m/z I % 331.1 100.0 301.1 93.9 317.0 6.4	m/z I % 286.1 100.0 287.0 26.6 231.3 12.8 258.2 12.0	Anthocyanin	2
122-positive	122	positive	403.035	12.0401	Pelargonidin pentoside	m/z I % 271.0 100.0 238.9 49.4 240.0 43.4		Anthocyanin	2
490-positive	490	positive	300.974	18.5854	Peonidin aglycone, fragment of peonidin hexoside			Anthocyanin	3
2-positive	2	positive	463.043	18.5758	Peonidin hexoside	m/z I % 331.1 100.0	m/z I % 286.1 100.0 287.0 26.6 231.3 12.8 258.2 12.0	Anthocyanin	2
27-positive	27	positive	478.984	17.0745	Petunidin hexoside	m/z I % 317.1 100.0	m/z I % 301.9 100.0 273.8 10.1 228.0 6.0 257.0 4.6 217.0 4.3 235.9 2.8 271.0 2.6 218.0 2.3 283.8 2.3 213.0 2.1	Anthocyanin	2
8-negative	8	negative	288.874	12.4971	Catechin	m/z I % 244.8 100.0 204.8 47.9 178.8 20.8 202.8 14.1 124.8 14.0 245.7 13.0 108.9 11.3 230.7 10.5	m/z I % 202.8 100.0 186.7 28.1 160.8 27.0 187.8 22.7 226.8 21.3 174.8 14.4 216.7 10.3 203.7 8.8 161.8 7.1 108.8 4.4 201.7 3.8 200.8 3.8 229.6 3.6 227.8 3.3 148.7 2.6	Flavanol	1
17-negative	17	negative	324.868	12.5463	catechin, chlorine adduct	m/z I % 288.8 100.0 144.8 3.7 162.8 2.4 186.9 1.4 265.0 0.7 145.8 0.6 163.8 0.5	m/z I % 244.8 100.0 204.8 37.6 245.8 19.1 178.8 17.2 202.8 16.0 160.8 10.2	Flavanol	3
66-negative	66	negative	440.865	22.4887	catechin/epicatechin gallate	m/z I % 288.8 100.0 168.7 26.2 289.7 13.8 330.8 8.8 270.8 7.0 192.8 6.0	m/z I % 244.8 100.0 204.8 27.3 178.7 22.2 202.7 19.1 245.8 16.5 185.6 8.1 246.7 6.9 124.7 6.4 160.8 6.2 230.7 5.3 166.8 5.0 164.8 4.1 108.9 4.0 286.8 3.6 187.8 3.2 205.6 3.1 216.8 2.7	Flavanol	1
303-negative	303	negative	476.901	22.3919	catechin/epicatechin gallate, chlorine adduct	m/z I % 440.8 100.0 356.9 5.5 166.8 4.8 167.8 1.0 387.9 0.8 387.0 0.7	m/z I % 288.8 100.0 168.7 24.1 289.7 13.2 330.7 12.0 244.8 8.1 296.9 6.6 124.8 5.3 314.8 4.2 169.7 4.0 423.0 3.7 258.8 3.6 252.8 3.6 192.7 3.4 270.8 3.2 245.7 3.0 302.8 3.0 286.8 2.7 290.8 2.3 136.7 1.9	Flavanol	3
302-negative	302	negative	434.905	35.0098	Coumaroyl catechin/epicatechin	m/z I % 288.8 100.0 340.8 15.7 164.7 15.5 268.9 13.5 289.7 10.1 162.7 8.2 314.7 4.8 136.8 3.6 270.8 3.5 390.7 3.1 244.8 2.7 270.5 2.0 341.8 1.9 176.7 1.8 204.7 1.7 216.8 1.7 252.8 1.5	m/z I % 244.7 100.0 204.7 40.6 202.7 30.5 136.7 15.8 246.7 13.6 270.8 11.2 124.7 11.0 245.7 10.8 166.7 10.7 246.2 9.0 178.7 8.8 226.7 7.6 247.8 6.5	Flavanol	3
24-negative	24	negative	288.876	16.4838	epicatechin	m/z I % 244.8 100.0 204.7 41.4 178.7 21.7 245.7 16.8 124.8 14.7 230.7 13.4	m/z I % 202.8 100.0 226.8 27.7 186.8 23.8 160.8 22.4 187.7 13.9 203.7 12.6 174.8 12.0 216.7 10.5 227.7 8.0 204.7 7.8 122.8 5.0 200.8 4.8 159.9 3.6	Flavanol	1
474-negative	474	negative	244.872	16.483	Fragment of epicatechin			Flavanol	3
14-positive	14	positive	291.045	12.5224	Catechin	m/z I % 138.9 100.0 123.0 72.6 164.9 26.7 147.0 25.6 150.9 12.6	nf	Flavanol	1
251-positive	251	positive	443.037	22.4952	Catechin gallate	m/z I % 273.1 100.0 151.3 27.3 139.1 23.2 123.1 22.6 147.0 8.1 316.6 6.2 290.9 5.5	m/z I % 123.1 100.0 151.0 12.1 162.8 7.0 188.7 5.2	Flavanol	1
31-positive	31	positive	291.033	16.4678	Epicatechin, fragment	m/z I % 139.1 100.0 123.1 85.8 165.0 30.5 147.1 20.2 151.0 18.1 272.5 5.3	nf	Flavanol	3
151-positive	151	positive	123.068	12.4572	Fragment of catechin			Flavanol	3
224-positive	224	positive	272.888	22.4695	Fragment of catechin gallate			Flavanol	3
292-positive	292	positive	123.097	16.4712	Fragment of epicatechin			Flavanol	3
159-negative	159	negative	432.923	27.5437	Dihydroxykaempferol deoxyhexoside	m/z I % 268.7 100.0 286.8 27.2 258.8 24.7 269.7 14.3	Nf	Flavonoid, other	2
33-negative	33	negative	448.917	23.8258	Dihydroxyquercetin deoxyhexoside	m/z I % 284.8 100.0 302.8 49.7 268.9 33.2 150.8 27.8 285.6 15.5 322.8 6.1 430.8 5.3 176.8 5.1 303.7 3.8	m/z I % 240.7 100.0 174.7 52.2 198.8 32.3 242.7 13.1 216.7 12.3 256.7 10.9 212.8 10.2	Flavonoid, other	2
32-negative	32	negative	448.519	16.4875	Eriodictyol hexoside	m/z I % 286.8 100.0 268.8 54.2 258.8 31.7	Nf	Flavonoid, other	2
429-negative	429	negative	434.822	31.0173	Phloridzin	m/z I % 272.8 100.0 273.8 16.6 166.7 6.0	m/z I % 166.7 100.0	Flavonoid, other	1
21-negative	21	negative	478.912	18.7081	tetrahydroxy-monomethoxyflavanone-C-hexoside	m/z I % 298.8 100.0 316.8 93.0 354.8 57.7 328.8 15.5 192.8 12.2 299.8 12.1 230.8 10.7 317.8 8.9 283.8 8.9 164.8 8.7 460.8 6.4 272.9 4.0 315.7 3.2 231.7 2.9 288.8 2.4 310.8 2.0 284.8 1.9 355.8 1.8 228.9 1.8 166.9 1.7 358.8 1.6 136.8 1.5 178.9 1.5	m/z I % 283.7 100.0 284.6 7.7 148.7 7.4 239.7 2.5 298.8 1.8	Flavonoid, other	3
176-positive	176	positive	305.045	23.8297	Dihydroquercetin aglycone	m/z I % 152.9 100.0 259.0 85.4 287.0 34.7 194.9 24.1 148.9 24.0 230.9 11.4		Flavonoid, other	2
792-positive	792	positive	447.102	21.1599	Trihydroxy-monomethoxy flavone-O-rhamnoside	m/z I % 301.0 100.0 301.7 18.6 317.0 1.9 367.1 0.5 287.1 0.5 166.9 0.3	m/z I % 286.1 100.0 287.0 26.6 231.3 12.8 258.2 12.0	Flavonoid, other	3
126-negative	126	negative	476.899	28.2619	Isorhamnetin-O-hexoside	m/z I % 313.9 100.0 314.6 62.1 284.8 18.9 356.8 16.8 315.7 13.7 270.9 12.1 242.8 11.0	m/z I % 284.8 100.0 299.7 62.1 270.8 54.7 285.7 41.8 271.7 23.6 256.7 13.1 242.8 10.0 298.7 9.5 300.7 9.2 286.8 7.8 243.8 7.2 312.8 5.2 313.8 4.3	Flavonol	2
213-negative	213	negative	446.859	27.4101	kaempferol O-hexoside	m/z I % 284.7 100.0 283.8 99.6 254.8 28.5 300.8 28.1 285.8 18.5 226.8 13.7 326.7 10.8 255.9 10.6 283.0 6.9 301.7 6.7 150.8 6.5	Nf	Flavonol	2
385-negative	385	negative	446.868	24.3181	kaempferol O-hexoside	m/z I % 284.7 100.0 283.9 67.9 254.8 24.9 326.7 13.6	m/z I % 254.7 100.0 255.7 34.6 257.6 8.8 228.7 7.6 212.8 7.1 267.7 7.1 162.7 6.3 256.6 6.2 226.8 6.2	Flavonol	2
229-negative	229	negative	478.94	20.693	Myricetin hexoside	m/z I % 315.8 100.0 316.7 66.5 270.7 8.2 178.7 7.9	m/z I % 270.8 100.0 178.7 55.0	Flavonol	2
671-negative	671	negative	610.811	21.5271	Myricetin pentosyl hexoside	m/z I % 478.7 100.0 316.8 69.3	Nf	Flavonol	2
473-negative	473	negative	300.814	36.8172	Quercetin aglycone	m/z I % 178.7 100.0 150.7 70.2 106.7 7.4	m/z I % 150.7 100.0	Flavonol	1
57-negative	57	negative	476.832	24.2857	quercetin O-glucuronide	m/z I % 300.8 100.0 301.4 18.3	m/z I % 150.7 100.0 178.7 72.8 151.7 11.0 256.8 7.7 272.8 6.9 179.7 6.3 228.8 4.1 106.8 3.7 192.8 3.2 120.8 2.8 189.0 2.6 238.9 2.5 184.6 2.1 121.0 2.1 162.7 2.0 191.7 1.8 300.7 1.6	Flavonol	1
44-negative	44	negative	462.884	24.0597	quercetin-3-O-glucoside	m/z I % 300.8 100.0 301.8 13.9 299.9 11.1 150.8 2.0 178.7 1.9 270.7 1.4 254.6 1.4 244.8 1.3	m/z I % 178.7 100.0 150.7 53.3 299.9 36.1 168.8 31.3	Flavonol	1
283-positive	283	positive	317.086	28.176	fragment of Isorhamnetin-O-glucoside			Flavonol	3
170-positive	170	positive	318.887	19.7175	fragment of Myricetin hexoside			Flavonol	3
206-positive	206	positive	303.051	24.1729	fragment of quercetin hexoside			Flavonol	3
417-positive	417	positive	303.073	23.6575	fragment of quercetin hexoside			Flavonol	3
707-positive	707	positive	303.081	25.1889	Fragment of quercetin pentoside			Flavonol	3
248-positive	248	positive	479.035	28.2313	Isorhamnetin-O-glucoside	m/z I % 317.0 100.0 317.9 10.6 425.0 0.5	m/z I % 284.9 100.0 301.9 74.6 273.9 42.8 176.0 22.7 257.1 22.2 164.9 21.6 270.9 21.2 230.1 20.0 137.0 17.2 139.0 16.2	Flavonol	1
680-positive	680	positive	318.809	29.1986	Myricetin aglycone	m/z I % 273.0 100.0 165.0 85.6 153.0 71.3 245.0 39.7 255.0 24.2 217.0 22.7 300.9 21.2 290.0 20.6		Flavonol	2
230-positive	230	positive	480.89	19.7221	Myricetin hexoside	m/z I % 319.0 100.0 319.8 9.5 317.3 5.1	m/z I % 152.9 100.0 244.9 82.1 273.2 55.6 164.9 52.9 301.9 30.2 283.0 28.8	Flavonol	2
857-positive	857	positive	480.757	30.6739	Myricetin hexoside	m/z I % 319.1 100.0	m/z I % 273.0 100.0 152.9 89.0 245.0 73.5 164.9 71.0 300.9 26.0 290.0 23.1 283.1 22.5 108.9 22.5 216.9 21.3 165.9 18.3 254.9 17.5 262.9 16.7 137.0 15.0 177.0 12.8	Flavonol	2
177-positive	177	positive	478.949	24.3093	Quercetin glucuronide	m/z I % 303.0 100.0 317.0 5.3	m/z I % 229.0 100.0 256.9 77.3 208.9 56.8 111.0 55.1 183.0 47.6	Flavonol	1
134-positive	134	positive	464.965	24.0037	Quercetin hexoside	m/z I % 303.0 100.0 301.3 3.7	m/z I % 228.9 100.0 164.9 42.3 256.9 36.5 136.9 27.7 212.9 17.6 152.9 16.8 109.2 13.4 206.9 11.6	Flavonol	1
97-positive	97	positive	464.92	23.4519	Quercetin hexoside	m/z I % 303.0 100.0 331.0 17.2 301.3 11.0	m/z I % 285.9 100.0 228.9 59.7 164.9 55.0 257.0 29.0	Flavonol	1
606-positive	606	positive	434.943	25.2411	Quercetin pentoside	m/z I % 303.0 100.0		Flavonol	2
3-negative	3	negative	190.754	3.01083	Citric acid	m/z I % 110.8 100.0 172.7 30.1 111.8 2.7 86.9 1.9 128.8 1.9 130.8 1.5 85.0 0.7 112.8 0.7	Nf	Organic acid	1
13-negative	13	negative	110.843	2.94169	Fragment of citric acid			Organic acid	3
9-negative	9	negative	148.773	2.60838	Putative tartaric acid			Organic acid	3
190-negative	190	negative	378.852	12.1142	Tartaric acid hexoside, chloride adduct	m/z I % 340.8 100.0 148.8 36.7	Nf	Organic acid	3
276-negative	276	negative	310.827	7.10706	caffeoyl tartaric acid	m/z I % 148.7 100.0 178.7 38.0 134.9 3.7 179.8 2.7 102.9 2.1 149.8 1.2 112.8 0.8 113.7 0.8 133.7 0.7	m/z I % 130.7 100.0 102.8 55.5	Phenolic acid	1
76-negative	76	negative	310.86	9.34136	Caffeoyl tartaric acid	m/z I % 148.7 100.0 178.7 44.1 149.7 7.0 134.8 5.8 102.9 3.1 179.7 2.8 130.8 1.5 86.9 1.0 266.8 0.9	m/z I % 130.7 100.0 102.8 71.1 86.8 65.8	Phenolic acid	1
464-negative	464	negative	622.618	9.43246	Caffeoyl tartaric acid, 2M-1 adduct	m/z I % 310.8 100.0 178.7 6.2 311.8 4.2 490.6 3.4 460.7 2.4 442.9 2.3	m/z I % 148.8 100.0 178.7 45.7 134.7 5.9	Phenolic acid	3
83-negative	83	negative	294.848	13.4478	coumaroyl tartaric acid	m/z I % 162.7 100.0 118.8 7.1 163.7 4.6 112.8 4.5 119.8 1.2	m/z I % 118.8 100.0	Phenolic acid	1
36-negative	36	negative	314.913	5.06981	Dihydroxybenzoic acid hexoside	m/z I % 152.8 100.0 151.8 14.9 122.8 10.1 108.8 5.3 164.7 5.0 311.8 4.8 162.7 3.9 107.8 3.2 206.8 3.1 150.9 3.1	m/z I % 122.8 100.0	Phenolic acid	2
189-negative	189	negative	350.908	4.82211	ethyl-dihydroxybenzoic acid hexoside (hydroxytyrosol) 1 chloride adduct	m/z I % 314.8 100.0 163.8 6.3 188.8 5.6 315.7 4.5 152.9 3.7 189.7 3.2	m/z I % 152.8 100.0 122.9 22.1 153.7 3.2	Phenolic acid	3
77-negative	77	negative	354.947	14.4853	Ferulic acid hexoside	m/z I % 192.7 100.0 216.7 53.5 174.8 53.3 133.8 18.1 159.7 14.7 193.7 8.3 201.7 6.2 234.8 5.1 294.9 4.6	m/z I % 133.8 100.0	Phenolic acid	2
43-negative	43	negative	324.854	15.5342	Ferulic acid pentoside	m/z I % 192.7 100.0 148.8 59.2 193.7 9.2 112.8 5.8 133.7 4.1 102.9 3.3 149.7 2.8	m/z I % 133.7 100.0 148.8 40.7 177.7 35.7 134.8 21.0	Phenolic acid	2
400-negative	400	negative	192.686	15.4618	Ferulic acid, putative fragment of Ferulic acid pentoside			Phenolic acid	3
62-negative	62	negative	148.758	9.3427	Fragment of Caffeoyl tartaric acid	m/z I % 86.9 100.0 102.8 99.9 130.7 58.1 59.0 24.7	m/z I % 59.0 100.0	Phenolic acid	3
49-negative	49	negative	178.79	9.35388	Fragment of Caffeoyl tartaric acid	m/z I % 134.8 100.0 135.7 5.1	Nf	Phenolic acid	3
345-negative	345	negative	168.808	3.63449	Gallic acid	m/z I % 124.8 100.0 125.8 2.8	Nf	Phenolic acid	1
22-negative	22	negative	330.875	4.11614	gallic acid hexoside	m/z I % 168.7 100.0 124.8 10.0 169.7 3.1 166.8 2.1 125.8 1.4 286.3 0.8 327.9 0.6	m/z I % 124.8 100.0 125.5 15.8	Phenolic acid	2
75-negative	75	negative	431.093	14.3778	Sinapic acid hexoside, formic acid adduct	m/z I % 384.9 100.0 178.8 21.7 204.8 17.9 152.8 14.2 385.8 12.8 160.8 11.7 222.9 11.0	m/z I % 152.8 100.0 204.8 88.4 222.8 53.7 160.8 37.3	Phenolic acid	3
86-positive	86	positive	339.05	5.08852	Dihydroxybenzoic acid hexoside Na-adduct	m/z I % 184.9 100.0 176.9 13.4 143.0 6.6	nf	Phenolic acid	3
98-negative	98	negative	576.777	20.9255	procyanidin P2 type	m/z I % 288.8 100.0 424.8 35.3 438.8 20.8 286.9 17.5 244.9 13.1 425.9 8.4 328.9 7.9 289.8 7.9	m/z I % 244.8 100.0 124.8 32.4 204.7 26.9 178.7 20.7 202.8 17.8 160.7 17.4 136.8 16.3 286.7 8.1	Proanthocyanidin	2
7-negative	7	negative	576.852	10.3572	procyanidin P2 type	m/z I % 424.8 100.0 406.8 88.3 450.8 23.2 288.8 18.8 425.7 14.2 407.6 12.5 286.8 7.2 451.8 6.6 558.7 6.5 298.8 6.0 380.9 4.6 244.9 4.5 226.8 4.5 438.7 4.1 289.9 3.9 272.8 3.9 268.8 3.8 559.8 3.5 393.0 3.0	m/z I % 406.8 100.0 272.8 5.7 338.8 3.0 298.9 2.7 228.9 2.6 340.7 2.1 297.8 2.0 244.8 1.7 280.9 1.6 186.7 1.5 380.6 1.5 362.9 1.5 124.7 1.4	Proanthocyanidin	2
26-negative	26	negative	576.823	18.9391	procyanidin P2 type	m/z I % 424.9 100.0 406.9 65.1 286.8 27.9 450.7 22.1 288.8 20.3 425.6 15.3 244.7 10.6 438.8 10.5 272.8 9.9 407.7 9.4 160.8 6.4 380.9 6.1 451.6 5.3 451.8 4.9 558.8 4.9 532.7 4.7 287.9 4.7 439.6 4.4 414.9 3.8 430.0 3.6 223.8 3.4 178.6 3.4 470.9 3.4 499.8 3.2	m/z I % 406.8 100.0 272.8 44.9 380.7 29.1 338.7 22.1 274.6 20.3 407.7 16.2	Proanthocyanidin	2
283-negative	283	negative	576.588	16.7852	procyanidin P2 type	m/z I % 424.9 100.0 406.9 65.1 286.8 27.9 450.7 22.1 288.8 20.3 425.6 15.3 244.7 10.6 438.8 10.5 272.8 9.9 407.7 9.4 160.8 6.4	m/z I % 406.8 100.0 272.8 44.9 380.7 29.1 338.7 22.1 274.6 20.3 407.7 16.2	Proanthocyanidin	2
180-negative	180	negative	576.866	14.8846	procyanidin P2 type i	m/z I % 424.8 100.0 406.9 79.2 288.9 24.4 425.7 18.9 407.9 17.2 298.8 14.8 289.8 12.6 451.7 10.9	m/z I % 406.8 100.0 407.5 22.5 272.8 7.0 380.9 5.5 338.9 5.1 228.8 3.1 298.9 2.9 136.7 2.4 176.7 2.0 286.7 1.9 254.6 1.7 242.7 1.3	Proanthocyanidin	2
745-negative	745	negative	1154.73	10.333	procyanidin P2 type, adduct 2M-1			Proanthocyanidin	3
288-negative	288	negative	728.907	18.6323	procyanidin P2G1 type	m/z I % 406.9 100.0 558.8 57.0 450.9 51.0 288.9 45.3 440.9 41.4 576.6 30.9 407.7 21.5 602.7 19.0 441.8 13.5 244.9 12.3 289.9 11.7 710.8 9.8 451.8 9.3	m/z I % 284.7 100.0 282.8 31.2 280.8 30.6 255.8 30.3 254.8 24.9 256.8 24.6 296.7 21.7 285.8 16.4 388.8 16.2 242.8 14.5 268.7 5.8 283.8 5.5 297.8 5.3 338.8 3.8 281.7 3.5	Proanthocyanidin	2
290-negative	290	negative	864.906	17.8937	procyanidin P3-type	m/z I % 694.8 100.0 424.9 46.7 576.8 44.9 406.9 44.7 695.7 43.2 286.8 31.0 558.7 28.3 738.7 27.5 244.8 25.5 450.7 20.7 542.8 19.3 412.8 17.4	m/z I % 524.7 100.0 242.7 88.2 542.7 85.0	Proanthocyanidin	2
104-negative	104	negative	864.873	13.1514	procyanidin P3-type	m/z I % 694.8 100.0 576.8 53.3 286.8 46.7 712.9 35.2 406.7 33.3 448.9 30.9 738.9 30.8 574.8 30.2 407.9 29.9 695.8 25.3 542.8 24.5 412.8 22.5 450.9 22.5 424.7 18.2 404.8 16.7 242.8 15.2 434.7 14.3 568.6 14.2 244.9 13.7 577.8 12.6 288.8 12.3 287.9 12.3 426.0 12.2	m/z I % 242.7 100.0 450.8 69.0 524.7 56.9	Proanthocyanidin	2
713-negative	713	negative	865.044	10.9045	procyanidin P3-type	m/z I % 694.8 100.0 576.9 90.6 695.8 67.4 738.8 59.6 406.7 56.5 450.8 53.3 574.8 41.5 712.8 32.4 586.6 29.8 542.8 28.3 286.8 28.3 714.0 24.6 424.9 23.1 577.6 22.4 242.8 22.2 618.7 22.0 288.9 20.9 433.0 20.2 448.8 19.8	m/z I % 542.6 100.0 242.8 60.9	Proanthocyanidin	2
355-positive	355	positive	426.984	10.7005	Fragment of Procyanidin B1			Proanthocyanidin	3
430-positive	430	positive	578.973	18.8475	Procyanidin P2 type	m/z I % 409.0 100.0 427.0 38.0 291.0 31.9 287.1 28.1 301.0 27.0 289.0 22.9 435.0 20.4 439.0 20.3 247.0 18.4 271.1 18.0 560.9 17.5 411.0 16.6 450.9 11.9 453.1 11.6 299.1 11.3		Proanthocyanidin	2
764-positive	764	positive	578.896	16.9727	Procyanidin P2 type	m/z I % 409.1 100.0 291.0 59.0 247.0 39.4 289.0 37.8 287.0 37.4 426.9 36.0 451.0 35.8		Proanthocyanidin	2
634-positive	634	positive	578.935	13.7159	Procyanidin P2 type	m/z I % 409.1 100.0 426.9 63.5 289.0 58.0 291.0 57.2 247.0 35.3 301.0 30.5 287.1 28.9 450.9 26.1 271.1 20.2		Proanthocyanidin	2
57-positive	57	positive	578.96	10.3237	Procyanidin P2 type	m/z I % 409.1 100.0 426.9 79.9 291.0 66.0 301.0 34.6 287.0 24.9 289.0 22.9 271.0 20.8 275.0 19.7 246.9 19.3 259.0 15.0	m/z I % 286.9 100.0	Proanthocyanidin	2
566-positive	566	positive	579.014	14.9006	Procyanidin P2 type	m/z I % 427.0 100.0 409.1 96.7 291.0 86.3 301.0 52.9 247.0 41.6 275.0 25.7 287.0 25.0 289.0 23.5 452.9 19.7 411.0 17.1 283.1 13.8 435.0 11.7 270.9 9.9 259.1 9.8		Proanthocyanidin	2
544-negative	544	negative	678.956	42.3597	a-viniferin	m/z I % 584.9 100.0 572.9 83.4 660.9 64.8 345.0 58.7 451.0 36.9 661.7 34.2 343.0 31.5 478.9 28.3 585.8 26.2 335.0 24.7 555.0 18.5 343.9 17.4 541.0 17.4 636.8 17.2 317.1 17.2 346.1 17.1 357.0 15.8 566.9 15.1 490.8 14.6 529.1 14.1 238.8 12.2	Nf	Stilbene	2
207-negative	207	negative	389.064	22.1881	cis-resveratrol-O glucoside	m/z I % 226.7 100.0 227.7 12.8	m/z I % 184.8 100.0	Stilbene	2
326-negative	326	negative	452.844	41.4356	e-viniferine	m/z I % 358.9 100.0 346.9 31.4 434.9 24.4 252.8 18.4 359.8 16.6 288.8 12.3 342.9 11.6 332.9 10.7 408.9 10.6 410.8 10.1	m/z I % 286.8 100.0 222.8 75.8	Stilbene	2
368-negative	368	negative	452.709	43.3297	e-viniferine	m/z I % 358.9 100.0 347.0 36.2 434.8 24.0 410.9 20.1 368.9 18.4 359.7 15.5 345.1 12.2 346.0 11.1	m/z I % 252.8 100.0 246.6 81.2 314.8 77.5	Stilbene	2
616-negative	616	negative	489.19	41.5111	e-viniferine, chloride adduct	m/z I % 452.8 100.0 453.8 22.8	Nf	Stilbene	3
425-negative	425	negative	499.007	41.4594	e-viniferine, formic acid adduct	m/z I % 452.9 100.0	m/z I % 332.7 100.0 346.8 77.6	Stilbene	3
102-negative	102	negative	434.94	22.1765	resveratrol-hexoside formic add.	m/z I % 388.8 100.0 226.8 32.4 227.7 6.1 270.8 5.8 387.9 1.9	m/z I % 226.8 100.0 227.8 13.6	Stilbene	3
500-negative	500	negative	226.944	22.1529	Resveratrol, fragment of cis-resveratrol-O-hexoside			Stilbene	3
183-negative	183	negative	388.921	28.7793	trans-resveratrol-O glucoside	m/z I % 226.8 100.0 227.7 11.6 250.7 1.3 182.8 1.1 184.6 0.9 268.8 0.7	m/z I % 184.6 100.0 182.7 95.3	Stilbene	2
370-negative	370	negative	424.84	28.7672	trans-resveratrol-O-glucoside, chloride adduct	m/z I % 388.9 100.0 226.9 23.7 227.8 4.1	m/z I % 226.8 100.0 227.7 12.7	Stilbene	3
590-negative	590	negative	226.818	28.8043	trans-resveratrol, putative fragment of trans-resveratrol-O-glucoside			Stilbene	3
240-negative	240	negative	452.525	28.813	Viniferin	m/z I % 358.8 100.0 359.8 30.6 264.8 13.4	m/z I % 264.8 100.0 265.7 20.8	Stilbene	2
502-negative	502	negative	584.684	31.817	Viniferin pentoside	m/z I % 452.8 100.0 453.7 30.8	Nf	Stilbene	2
129-negative	129	negative	584.42	27.8888	Viniferin pentoside	m/z I % 452.8 100.0 453.9 20.9 453.7 16.9	Nf	Stilbene	2
325-negative	325	negative	498.931	28.8652	Viniferin, formic acid adduct	m/z I % 452.9 100.0 453.9 33.7	m/z I % 358.8 100.0 359.8 35.7	Stilbene	3
280-positive	280	positive	229.028	28.7657	Fragment of resveratrol hexose			Stilbene	3
212-positive	212	positive	229.031	30.7219	Resveratrol	m/z I % 135.0 100.0 107.0 36.2 119.0 21.2 211.0 12.4 183.0 11.5		Stilbene	1
393-positive	393	positive	413.033	28.8022	Resveratrol hexose, sodium adduct	m/z I % 229.2 100.0 184.9 69.5 428.9 60.0 447.7 37.7 170.9 30.8 449.6 26.1 250.1 23.0 431.0 22.8 433.3 22.5	m/z I % 157.1 100.0 135.0 53.4	Stilbene	3
1-negative	1	negative	438.833	2.66361	di-hexose derivative	m/z I % 276.8 100.0 340.8 66.1	Nf	Sugar	3
37-negative	37	negative	487.479	2.42159	Dihexose + deoxyhexose (146)	m/z I % 144.7 100.0 340.9 97.3 145.8 59.1 178.6 9.4	m/z I % 178.8 100.0	Sugar	3
72-negative	72	negative	294.984	2.56492	fragment of di-hexose derivative (387)	m/z I % 178.7 100.0 132.7 76.6 234.8 25.5 204.6 15.8 112.8 14.1 160.7 12.2 88.9 9.0 118.9 8.2 100.9 5.6 114.7 5.4 142.7 4.9 275.8 4.3 130.7 3.9	m/z I % 118.9 100.0 142.8 86.5 112.8 71.8 160.9 66.7	Sugar	3
45-negative	45	negative	344.406	4.03519	Hexose derivative, putative isotope of ion 341 m/z	m/z I % 178.7 100.0 163.8 27.0 340.8 19.6 180.7 16.4 179.7 14.4 118.8 9.1 130.8 8.4 112.9 8.0 142.8 7.2 160.8 6.2 210.7 5.9 100.8 5.1	m/z I % 88.9 100.0 142.7 90.9 112.8 79.5 148.8 47.7	Sugar	3
64-negative	64	negative	178.799	4.49917	Hexose, putative fragment of ion 341 m/z	m/z I % 160.7 100.0 142.7 99.0 88.8 85.9 112.8 74.9 118.8 67.0 59.1 26.3 130.8 21.7 100.9 21.5 86.9 16.3	Nf	Sugar	3
2-negative	2	negative	340.919	2.36744	Sucrose	m/z I % 178.7 100.0 112.9 23.9 160.7 22.6 118.8 19.0 142.8 17.6 130.8 9.5 148.8 5.4 100.9 5.1 179.8 4.8 124.7 4.2 161.7 2.8 114.8 1.6 113.8 1.5 106.9 1.0 280.8 0.9	m/z I % 88.9 100.0 112.8 92.7 142.8 88.3 130.7 78.7 160.8 75.5 118.8 74.5 71.0 24.4 100.8 22.8 88.5 13.7 87.1 13.5 124.7 12.4	Sugar	1
4-negative	4	negative	386.876	2.34686	sucrose formic adduct	m/z I % 340.9 100.0 178.9 0.5 215.1 0.4	m/z I % 178.7 100.0 142.8 39.6 118.8 37.6 112.7 18.9 100.9 17.6 130.7 10.4 160.6 10.1	Sugar	3
5-negative	5	negative	682.871	2.45927	sucrose, adduct 2M-1	m/z I % 340.8 100.0 341.8 16.4	Nf	Sugar	3
3-positive	3	positive	218.995	2.36572	Fragment of sucrose			Sugar	3
17-positive	17	positive	203.211	2.53622	Fragment of sucrose, sodium adduct			Sugar	3
1-positive	1	positive	381.015	2.40646	Sucrose, potassium adduct	m/z I % 203.0 100.0 185.0 56.1 275.0 3.6 304.9 2.3 347.1 1.7 143.0 1.6		Sugar	3
8-positive	8	positive	365.059	2.76854	sucrose, sodium adduct	m/z I % 202.9 100.0 185.0 50.1 275.0 2.1		Sugar	3
